# Supplementary material
Source: MDPI journal article supplement (https://www.mdpi.com/2199-8531/8/3/152)
Supplement: s1 [file s1]

Archive with 1 entries (1 files):
- JOItmC-1778235-supplementary.pdf
